# Supplementary material
Source: MDPI journal article supplement (https://www.mdpi.com/2673-4583/5/1/45)
Supplement: s1 [file s1]

# The inhibition study of cytochrome *bd* oxidase using the enzyme-based electrochemical sensor

Université  
de Strasbourg

Iryna Makarchuk<sup>1</sup>, A. Nikolaev<sup>1</sup>, A. Thesseling<sup>2</sup>, L. Dejon<sup>3</sup>, D. Lamberty<sup>3</sup>, L. Stief<sup>3</sup>, A. Speicher<sup>3</sup>,  
T. Friedrich<sup>2</sup>, P. Hellwig<sup>1</sup>, H.R. Nasiri<sup>4</sup>, F. Melin<sup>1</sup>

<sup>1</sup>Laboratoire de Bioélectrochimie et Spectroscopie, UMR 7140, Chimie de la Matière Complexe, Université de Strasbourg, France

<sup>2</sup>Institut für Biochemie, Albert-Ludwigs-Universität, Freiburg, Germany

<sup>3</sup>Fachbereich 11 Organische Chemie, Universität des Saarlandes, Saarbrücken, Germany

<sup>4</sup>Institute of Microbiology, University of Hohenheim, Stuttgart, Germany

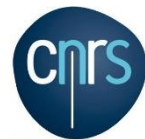

## INTRODUCTION

The cytochrome *bd* oxidases, membrane enzymes found only in the respiratory chain of the prokaryotes, are of large interest for the development of future antibiotics as they are believed to be involved in bacterial adaptability mechanisms. They catalyze the reduction of molecular oxygen in water and oxidation of quinols and contribute to the proton motive force required for the ATP synthesis [1]. Due to their hydrophobic nature, membrane proteins are more difficult to handle than soluble proteins, thus method of protein film voltammetry has been applied.

Here, we have developed a biosensor for the study of terminal oxidases based on their immobilization on gold nanoparticles modified with a self-assembled monolayer of thiols [2,3]. This electrochemical sensor was used for the inhibition screening of a target-focused library of 34 compounds which belong to the families of quinones, naphthoquinones, phenols, quinolones, coumarins and flavonoids against cytochrome *bd* oxidase [4].

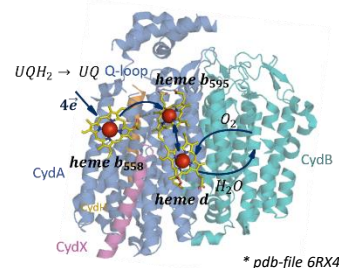

## METHODS

### PFV immobilization

- The electrode preparation process takes less than 3 hours
- The optimal enzyme concentration is 10  $\mu$ M
- An approximate surface coverage of the active protein is 0.1 pmol-cm<sup>-2</sup>

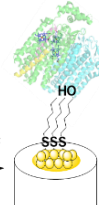

SEM and CV of an electrode modified with gold nanoparticles

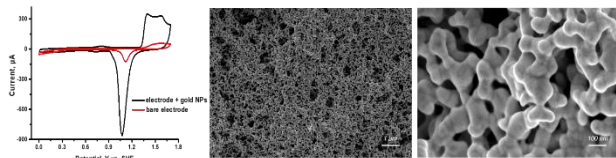

### Protein film stability

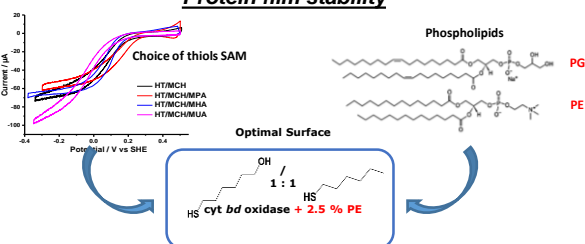

### Target-focused Compound Library

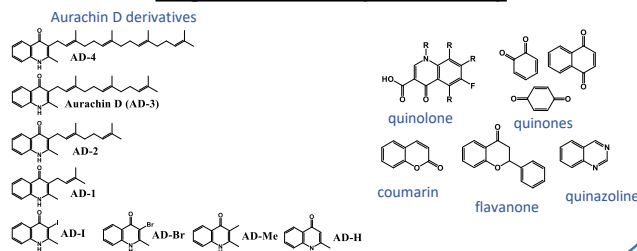

## RESULTS

### Primary Inhibition Screening

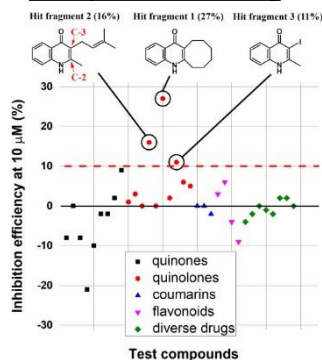

- The quinolones with alkyl and iodine substituents in C-2 and C-3 were identified as leads out of 34 molecules library
- The quinolones with no substituent or polar substituents such as hydroxy, carboxylic acids or esters showed no or little inhibition towards cyt *bd* oxidase

### Aurachin D derivatives inhibition activity

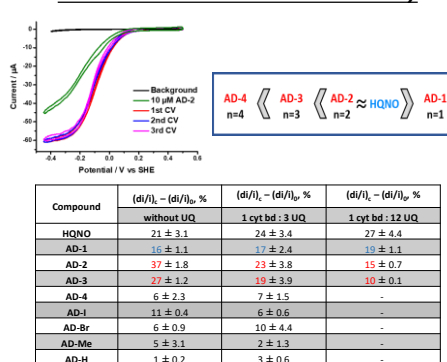

- The length of isoprenoid chain plays crucial role on inhibition in synthesized derivatives of Aurachin D
- Inhibition effectiveness decreases as follows: AD-2 > AD-3 ≈ HQNO > AD-1 > AD-4 ≈ AD-1 ≈ AD-Br ≈ AD-Me > AD-H

### Half-inhibitory Concentration determination

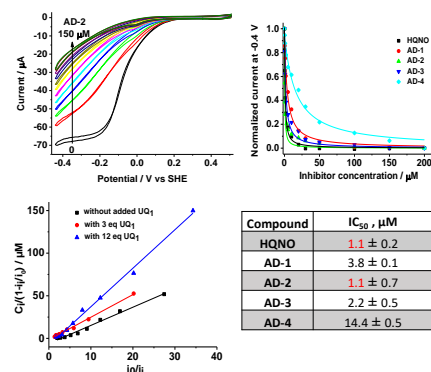

- AD-2 is the most active inhibitor against *bd* oxidase, not natural Aurachin D as was reported before in literature
- The results point on the competitive binding of the AD-2 and AD-3 with the natural substrate UQ

## REFERENCES

- [1] S. Safarian, A. Hahn, D. J. Mills, et al, Active site rearrangement and structural divergence in prokaryotic respiratory oxidases, Science, 366 (2019) 100-104.
- [2] E. Fournier, A. Nikolaev, H. Nasiri, et al, Creation of a gold nanoparticle based electrochemical assay for the detection of inhibitors of bacterial cytochrome *bd* oxidases, Bioelectrochemistry, 111 (2016) 109-114.
- [3] A. Nikolaev, I. Makarchuk, A. Thesseling, et al, Stabilization of the highly hydrophobic membrane protein, cytochrome *bd* oxidase, on metallic surfaces for direct electrochemical studies, Molecules 25 (2020), 3240.
- [4] I. Makarchuk, A. Nikolaev, A. Thesseling, et al, Identification and optimization of quinolone-based inhibitors against cytochrome *bd* oxidase using an electrochemical assay, Electrochimica Acta 381 (2021) 138293.

## ACKNOWLEDGMENTS

We are grateful to the University of Strasbourg Institute for Advances Studies (USIAS), the IDEX PDI program from the University of Strasbourg and the Deutsche Forschungsgemeinschaft by grant 235777276/RTG 1976.
